# Supplementary material for: The Bellinge data set: open data and models for community-wide urban drainage systems research
Source: Copernicus journal article supplement (doi:10.5194/essd-2021-8), 2021-04-06
Supplement: Supplementary file [file essd-2021-8-AC3-supplement.pdf]

**Detailed point-to-point responses to comments from reviewers**

|                                                                                                                                | Reviewer comment                                                                                                                                                                                                                                                                                                                                                                                                                                                                                                                                                                                                                                                                                                                                                           | Author response<br><i>References made to locations in the manuscript within this column refer to the revised manuscript</i>                                                                                                                                                                                                               |
|--------------------------------------------------------------------------------------------------------------------------------|----------------------------------------------------------------------------------------------------------------------------------------------------------------------------------------------------------------------------------------------------------------------------------------------------------------------------------------------------------------------------------------------------------------------------------------------------------------------------------------------------------------------------------------------------------------------------------------------------------------------------------------------------------------------------------------------------------------------------------------------------------------------------|-------------------------------------------------------------------------------------------------------------------------------------------------------------------------------------------------------------------------------------------------------------------------------------------------------------------------------------------|
| <b>CC1 – Community referee (<a href="https://doi.org/10.5194/essd-2021-8-CC1">https://doi.org/10.5194/essd-2021-8-CC1</a>)</b> |                                                                                                                                                                                                                                                                                                                                                                                                                                                                                                                                                                                                                                                                                                                                                                            |                                                                                                                                                                                                                                                                                                                                           |
| CC1.0                                                                                                                          | <p>Dear Authors,</p> <p>Thank you for sharing such a comprehensive dataset with the community. In my opinion, your paper is a very important contribution, since it fills a gap in the field of urban hydrology, which lacks open data. While having a look at the SWMM model, I encountered an error related to the rainfall input. I think the link to the time series file is broken. In principle, this issue can be fixed easily. However, in case you plan to update the online repository, I would recommend to update the inp file of the model in order to make it easier for people who just started modelling with SWMM. Anyway, I really like your study and I am looking forward to your final revised paper!</p> <p>Best wishes,</p> <p>Kristian Förster</p> | <p>Dear Kristian Förster,</p> <p>Thank you very much for your feedback and comment. We have modified the file in the repository with the suggested change and hope that this change makes it easier for users to apply. We look forward to hear about your future work based on the data set.</p> <p>Best wishes,</p> <p>The authors.</p> |
